# Supplementary material for: Ecological stoichiometric characteristics and influencing factors of carbon, nitrogen, and phosphorus in the leaves of Sophora alopecuroides L. in the Yili River Valley, Xinjiang
Source: PeerJ journal article supplement (doi:10.7717/peerj.11701), 2021-07-14
Supplement: Raw_data.xlsx [file Raw_data.xlsx]

## Sheet: Description of file content
A brief description of the file contents: This document contains two contents, which are the original data of soil chemical properties in four different habitats of Sophora alopecuroides and the ecochemical metrological characteristics of Sophora alopecuroides leaves. In this paper, soil samples and plant samples of Sophora alopecuroides leaves were collected from four habitats: under forest, roa…

## Sheet: chemical properties of soil
Soil physical and chemical properties of Sophora alopecuroides in different habitats
number	Type of sampling site	Layer（cm）	Total nitrogen content in soil	Total phosphorus content in soil	Total potassium content in soil	Nitrate nitrogen（NO3--N）	Ammonium nitrogen (NH4+-N)	Available phosphorus （AP）	Available potassium （AK）	Total carbon content in soil	Organic matter （OM）	pH
			g/kg	g/kg	g/kg	mg/kg	mg/kg	mg/kg	mg/kg	g/kg	g/kg
1	Forest	0-10	1.33123	0.821213	13.5737	3.61	3.04	41.8624	604.345	13.3061	22.8453	7.93233
2		10-20	0.951239	0.891673	13.2975	7.34	4.07	2.66543	440.94	9.34561	16.0773	7.94933
3		20-30	1.01123	0.931235	12.7543	7.36	3.12	2.91855	327.248	8.6443	14.83	8.054
4	Forest	0-10	1.34223	0.833455	13.6285	3.6	3.02	41.8451	611.26	13.2661	22.9333	7.95433
5		10-20	0.984233	0.901775	13.0736	7.36	4.09	2.68636	438.77	9.32561	16.0553	7.96233
6		20-30	1.03323	0.913305	12.6017	7.49	3.11	2.92507	324.508	8.6303	14.883	8.034
7	Forest	0-10	1.35323	0.851679	13.6205	3.62	3.04	41.7612	607.231	13.2861	22.9453	7.95133
8		10-20	0.991453	0.941656	13.4002	7.35	4.05	2.69759	447.805	9.30561	16.0923	7.98933
9		20-30	1.04123	0.921343	12.8122	7.42	3.07	2.87993	328.945	8.6223	14.885	8.041
10	Roadside	0-10	0.451424	0.657588	17.8899	1.375	4.558	9.48636	234.333	10.7347	18.5266	7.88133
11		10-20	0.461424	0.652747	17.7334	2.305	3.557	4.74507	164.043	9.34227	16.075	7.819
12		20-30	0.52254	0.53064	17.872	1.428	4.343	4.45966	164.894	7.64491	13.1571	7.802
13	Roadside	0-10	0.470454	0.643881	17.8492	1.345	4.578	9.52336	236.634	10.7407	18.5216	7.87133
14		10-20	0.480454	0.679747	17.7234	2.314	3.627	4.77507	160.873	9.32427	16.097	7.794
15		20-30	0.548549	0.49364	17.842	1.408	4.393	4.47266	163.864	7.65403	13.1971	7.823
16	Roadside	0-10	0.480454	0.66758	17.9199	1.375	4.588	9.50636	232.015	10.7147	18.4934	7.88133
17		10-20	0.480454	0.697747	17.7875	2.306	3.617	4.77507	161.493	9.30424	16.075	7.796
18		20-30	0.5181	0.51364	17.862	1.418	4.393	4.46966	165.954	7.66491	13.2371	7.809
19	Desert	0-10	0.730225	0.730191	21.4743	4.073	3.274	13.2497	1129.94	10.7187	18.1734	8.643
20		10-20	1.0636	0.770191	21.3403	3.821	3.304	5.34974	1135.94	7.0186	12.2734	8.787
21		20-30	0.843906	0.680191	20.2533	4.169	4.002	6.95374	1048.32	5.31704	9.27496	8.822
22	Desert	0-10	0.752226	0.720191	21.4916	4.066	3.292	13.2502	1135.62	10.5397	18.2132	8.605
23		10-20	1.0636	0.76294	21.36	3.872	3.546	5.37804	1078.95	7.12427	12.2522	8.805
24		20-30	0.853906	0.66294	20.2895	4.351	3.846	6.9437	1044.74	5.44865	9.24176	8.805
25	Desert	0-10	0.740226	0.74019	21.4802	4.027	3.301	13.3458	1136.25	10.4127	18.225	8.617
26		10-20	1.0366	0.75019	21.3912	3.811	3.721	5.39855	1060.95	7.2201	12.302	8.792
27		20-30	0.863406	0.643483	20.2403	4.243	3.861	6.9285	1043.06	5.3581	9.24754	8.822
28	Farmland	0-10	1.05747	0.941687	22.135	1.921	3.839	7.0995	255.345	10.4522	18.0413	7.793
29		10-20	0.890191	0.951687	21.1348	1.765	2.827	7.4335	207.254	8.2602	14.2521	7.926
30		20-30	1.25019	1.05169	21.8929	1.855	3.789	15.138	203.479	11.1727	19.2324	7.83
31	Farmland	0-10	1.03019	0.926657	22.1109	1.892	3.942	7.09141	255.433	10.4706	18.0603	7.782
32		10-20	0.882285	0.926643	21.1369	1.762	2.852	7.41635	207.442	8.26978	14.243	7.897
33		20-30	1.22647	1.08019	21.8963	1.808	3.824	15.1595	203.555	11.2015	19.2618	7.83
34	Farmland	0-10	1.02747	0.940612	22.111	1.877	3.953	7.09294	255.488	10.4886	18.0535	7.778
35		10-20	0.871763	0.926193	21.141	1.744	2.811	7.40294	207.502	8.27191	14.2742	7.892
36		20-30	1.2236	1.1262	21.91	1.822	3.791	15.17	203.588	11.1427	19.2822	7.84
This paper is the original data of soil physical and chemical properties in four different habitats of Sophora alopecuroides. In Qapqal County, Yil River Valley, four habitats were selected: forest, roadside, farmland and desert. Three 1 m×1 m quadrats were randomly set up in each of the four invasive habitats of S. alopecuroides and each plot was a repeat. Soil samples of 0~10、10~20、20~30 cm wer…

## Sheet: Stoichiometric characteristics
Ecostoichiometric characteristics of Sophora alopecuroides in different habitats
Research area	number	sampling site	latitude	longitude	altitude	C content of Sophora alopecuroides leaves	N content of Sophora alopecuroides leaves	P content of Sophora alopecuroides leaves
						g/kg	g/kg	g/kg
Village of sparrow	1	Forest	43.84°N	81.09°E	579.1m	473.394	37.446	1.6389
	2		43.84°N	81.09°E	588.4m	488.235	41.5825	1.42119
	3		43.83°N	91.09°E	588.2m	391.304	36.0339	1.2485
	4	Roadside	43.83°N	91.09°E	551m	400	8.90129	0.825651
	5		43.83°N	81.08°E	551.1m	519.796	29.7164	1.12437
	6		43.83°N	81.08°E	550m	445.872	43.1385	1.80562
	7	Farmland	43.83°N	81.05°E	589m	494.444	37.1208	1.77988
	8		43.83°N	81.05°E	590m	393.103	36.2862	1.88046
	9		43.83°N	81.05°E	593.5m	528.6	38.7614	2.0422
Qingquan Village	10	Desert	43.80°N	81.17°E	596.3m	533.097	37.8499	1.68654
	11		43.80°N	81.18°E	596m	496.893	22.348	0.711133
	12		43.80°N	81.20°E	596.2m	476.289	23.2796	1.00044
This document is the original data of ecostoichiometric characteristics of Sophora alopecuroides leaves in four different habitats. In the Qapqal County of the Yili River Valley, four habitats are selected: forest, roadside, farmland and desert. Three samples were randomly selected from each habitat to measure the ecological and chemometric characteristics (C content, N content, P content) of Sop…
